## Review Article

# Influenza virus N-linked glycosylation and innate immunity

Ian A. York, James Stevens and  Irina V. Alymova

Influenza Division, National Center for Immunization and Respiratory Diseases, Centers for Disease Control and Prevention, Atlanta, GA, 30329, U.S.A.

**Correspondence:** Irina V. Alymova (ialymova@cdc.gov)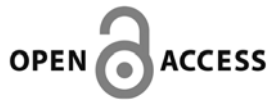

Influenza viruses cause seasonal epidemics and sporadic pandemics in humans. The virus's ability to change its antigenic nature through mutation and recombination, and the difficulty in developing highly effective universal vaccines against it, make it a serious global public health challenge. Influenza virus's surface glycoproteins, hemagglutinin and neuraminidase, are all modified by the host cell's N-linked glycosylation pathways. Host innate immune responses are the first line of defense against infection, and glycosylation of these major antigens plays an important role in the generation of host innate responses toward the virus. Here, we review the principal findings in the analytical techniques used to study influenza N-linked glycosylation, the evolutionary dynamics of N-linked glycosylation in seasonal versus pandemic and zoonotic strains, its role in host innate immune responses, and the prospects for lectin-based therapies. As the efficiency of innate immune responses is a critical determinant of disease severity and adaptive immunity, the study of influenza glyco-biology is of clinical as well as research interest.

## Introduction

Influenza viruses have caused epidemic and pandemic disease in humans for hundreds of years [1], but the disease remains difficult to predict and prevent. Three types of influenza viruses infect humans: A, B, and C. While wild waterfowl and other birds are the primary reservoirs of influenza A virus (IAV) [2], humans are the primary host and reservoir of influenza B and C viruses (IBV and ICV, respectively) [3,4]. In addition to the primary reservoirs, IAV can infect many other species, including domestic species such as pigs, horses, dogs, and cats [2,5]. IBV and ICV are less broadly infectious but have been shown to infect seals [6], pigs, and dogs [7,8]. There are therefore many sources of influenza virus exposed to humans.

Among the three influenza types, IAV is the greatest public health concern because of its ability to cause not only widespread seasonal epidemics, but also pandemics originating from zoonotic infections [9–13]. IBV has not yet been associated with pandemics but causes seasonal epidemics and is responsible for ~25% of human seasonal influenza infections [14,15]. Together, seasonal epidemics of IAV and IBV can cause up to 5 million infections and 500,000 deaths annually [16]. Type C virus typically causes a mild respiratory illness [17] and in contrast with IAV and IBV, it is not included in the composition of seasonal influenza vaccines. As it is of less public health concern, ICV has been less studied than IAV and IBV. Therefore, this review will focus on IAV and IBV only.

## Influenza glycoproteins

Influenza viruses belong to the Orthomyxoviridae family and contain a genome consisting of eight negative sense RNA segments. Segments four and six encode two major virus surface glycoproteins, the hemagglutinin (HA), a trimeric lectin, and the neuraminidase (NA), a tetrameric enzyme (Figure 1A). The number of NAs on the viral surface is up to 10-fold less than HAs [18]. The external parts of both proteins consist of a stalk and globular head regions. HA is the virus's primary receptor-binding protein, binding to specific receptors that possess terminal *N*-acetylneuraminic acid (Neu5Ac or sialic acid [SA]),

Received: 15 October 2018  
Revised: 03 December 2018  
Accepted: 13 December 2018

Accepted Manuscript Online:  
14 December 2018  
Version of Record published:  
08 January 2019

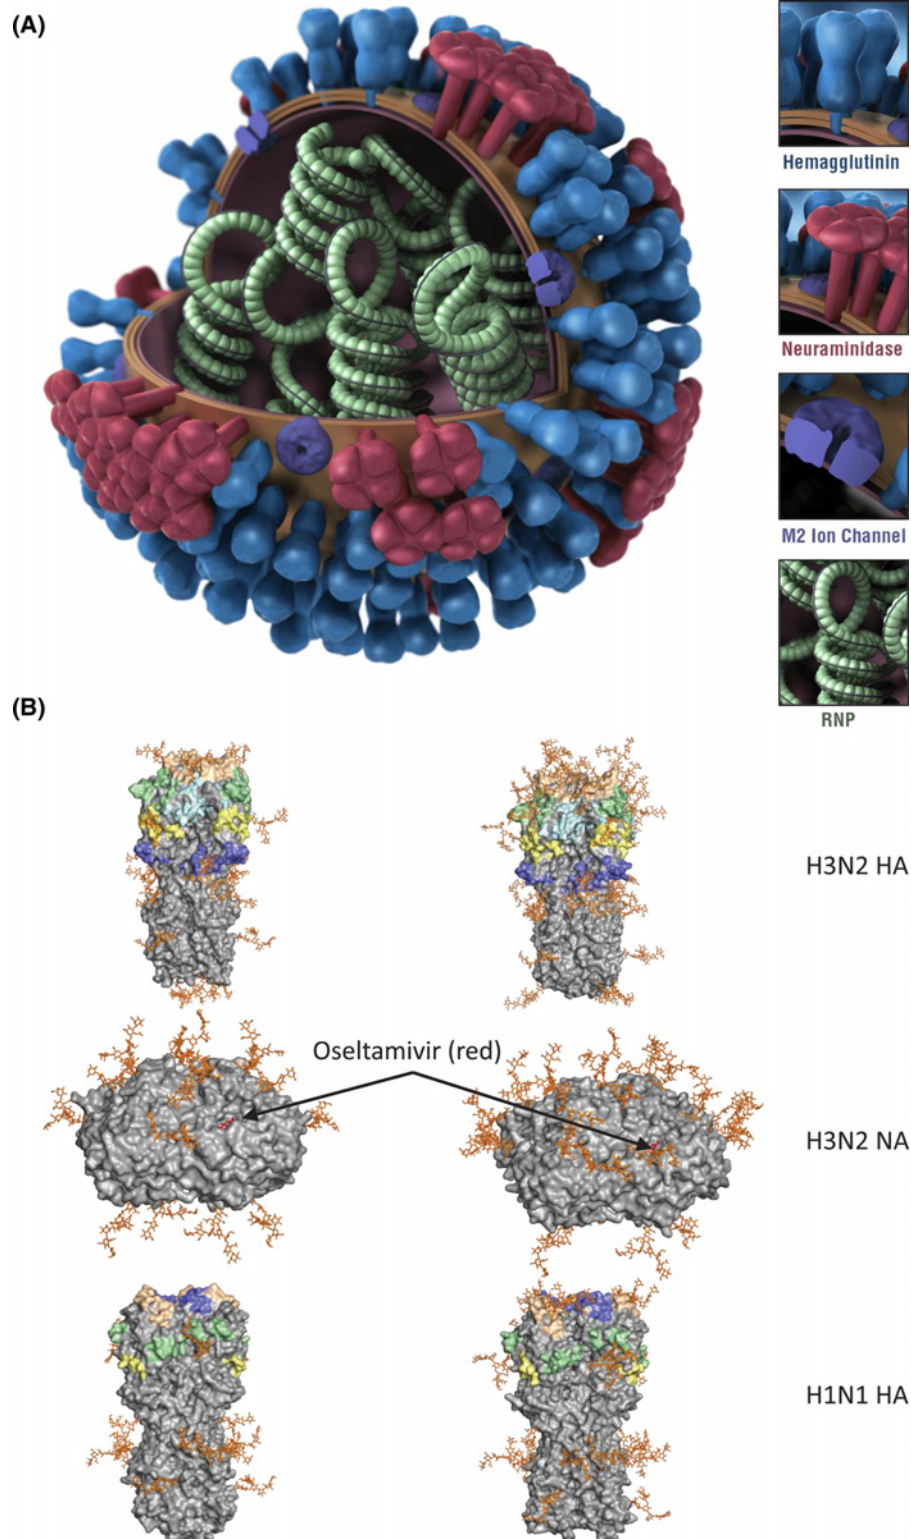

**Figure 1. Influenza virus surface glycoproteins**

(A) Schematic diagram of an influenza virion, showing HA and NA (provided by CDC Influenza Division/Douglas Jordan/Dan Higgins). (B) Structure of HA (top and bottom rows) and NA (middle row) showing NLG sites for early (left columns) and recent (right column) isolates of A(H3N2) and A(H1N1) IAV. 'Oseltamivir' (in red) indicates the NA active site. Early A(H3N2) isolate: A/Hong Kong/1/1968(H3N2). Recent A(H3N2) isolate: A/Singapore/INFIMH-16-0019/2016(H3N2). Early A(H1N1) isolate: A/South Carolina/1/1918(H1N1). Recent A(H1N1) isolate: A/Brisbane/59/2007(H1N1).

particularly on epithelial cells and mucins of human respiratory tracts (RT) [19]. SA-independent binding and internalization of influenza virus HA also occur via specific cell-surface proteins on alveolar and recruited monocytes/macrophages, dendritic cells (DCs), and B cells [20–26]. Binding to cell receptors is the first step in the process leading to a productive virus infection. As with HA, NA also has specificity for terminal SA [27]. The primary role of influenza virus NA is to cleave SA residues from virus and cellular glycoproteins at the time of the budding of newly formed virions from the surface to prevent virus-self aggregation and enable its release from infected cells. As well, NA cleaves SA from the mucins of the RT to facilitate viral movement to target cells [28–30].

IAV HA and NA are antigenically variable, with 18 structural variants of IAV HA and 11 variants of NA have been identified [31]. IAV subtypes are named based on their HA and NA combinations. In the 20th and 21st centuries, most IAV-related diseases in humans have been caused by the A(H1N1), A(H2N2), and A(H3N2) subtypes. In 1918, the highly pathogenic pandemic A(H1N1) killed as many as 50–100 million people [32]. In 1957, A(H1N1) was replaced by A(H2N2), and in 1968 the A(H3N2) strain caused a global pandemic associated with more than one million deaths [33]. In 1977 the A(H1N1) virus re-emerged and co-circulated with A(H3N2) until 2009, when the swine-origin A(H1N1) pandemic (A(H1N1)pdm09) IAV replaced the older, antigenically distinct human seasonal A(H1N1) strain. Humans are also sporadically infected with highly and low pathogenic avian influenza A viruses, particularly H5, H9, and H7 HA subtypes. As yet, these viruses do not efficiently spread from person to person.

The surface glycoproteins of IAV, especially HA, are very tolerant of amino acid variations [34], allowing them to accumulate mutations that alter their antigenic nature. As IAV circulates in humans, HA and to a lesser extent NA [34] are therefore able to undergo repeated antigenic changes in response to population immunity. This ‘antigenic drift’ presents a public health challenge because of the need to adjust the composition of seasonal vaccine in most years to provide protection against newly circulating antigenic variants. In contrast with IAV, IBV do not have subtypes of HA and NA. Influenza B viruses were first identified in the 1940s, and in the 1980s evolved into two genetically and antigenically distinct lineages, the B/Victoria/2/87 and the B/Yamagata/16/88 lineages. Co-circulation of both influenza B virus lineages with influenza A(H3N2) and A(H1N1) viruses during seasonal epidemics has prompted the development of quadrivalent vaccines that include strains from both subtypes of IAV and both influenza B lineages.

## Influenza virus glycosylation

As well as simple amino acid changes, antigenic drift often involves changes in influenza virus HA and NA glycosylation patterns that shield or expose particular antigenic sites on these glycoproteins [35]. Host–cell dependent glycosylation is a critical post-translational modification of influenza virus HA and NA. Glycosylation in the HA stalk region is important for protein folding and trafficking and for pH stability [36–38], while the extent of glycosylation near the HA receptor-binding site alters its affinity for SA-containing receptors [39–41]. Glycosylation near the cleavage HA site also modulates virus pathogenicity [42,43]. While the role of glycosylation of NA is less well understood, N-linked glycosylation is important for functional NA [44], and lack of NA glycosylation increases neurovirulence of the A/WSN/33 IAV strain in mice [45].

Glycosylation of HA and NA occurs through attachment of an oligosaccharide molecule to the side-chain amide nitrogen of Asn in the context of the conserved N-linked glycosylation (NLG) sequon Asn-X-Ser/Thr, where X may represent any amino acid except Pro [46]. This attachment occurs with the help of glycosyltransferases and oligosaccharyltransferase in the endoplasmic reticulum (ER) and is followed by a complex process of trimming and remodeling of the oligosaccharides by glycosidases and mannosidases during transit through the ER and Golgi. This process results in a glycoprotein whose N-linked oligosaccharides branched structures terminate in mannose (high-mannose glycans), galactose and/or N-acetyl-galactosamine/fucose (complex glycans), or a combination (hybrid glycans) [47,48]. Some influenza virus HA and NA NLG sites may contain predominantly high-mannose glycans as the result of steric hindrance preventing access to the glycosyltransferases [49]. In contrast with cellular proteins, the complex oligosaccharides on influenza virus HA and NA are typically not sialylated, since NA removes the terminal SA [50]. To date, NLG is the only type of glycosylation observed for influenza virus HA and NA: there has been no O-linked (i.e. attachment of a sugar molecule to the hydroxyl group of Ser or Thr on the polypeptide chain) or C-linked (i.e. attachment of a sugar to a carbon group on a Trp side-chain) glycosylation reported for influenza virus.

## Techniques for influenza glycoprotein analysis

The simplest way to predict NLG addition is to identify a sequon, Asn-X-Ser/Thr, within the primary glycoprotein amino acid sequence. However, not all sequons are fully or even partially occupied, for various reasons including

amino acid sequence [51–53] and the specific cell type infected by the virus. Amino acid sequence also does not allow accurate prediction of the nature of the glycans added to different sites [54]. Approaches for more detailed analysis of influenza virus NLG have been comprehensively described in a recent review [55]. Briefly, these approaches can be divided into two major groups: those providing information on the nature and relative abundance of the glycoforms present on a glycoprotein, and those that further determine the degree to which each sequon is actually occupied by glycans. The first group of methods requires the initial release of glycans from the glycoproteins (e.g. by using hydrazine or the enzymes PNGase F and PNGase A) followed by mass spectrometry (MS) [56–58] or high-performance liquid chromatography [59,60] for analysis of the released glycoforms. The second group of methods for NLG analysis involves immobilization of glycoproteins (using lectins or periodate-treated glycopeptides linked to hydrazide-activated beads) prior to enzymatic treatment with PNGaseF [61–63]. During the process of glycan release, the Asn-X-Thr/Ser sequence converts to Asp-X-Thr/Ser, resulting in a mass difference. Subsequent MS/MS analysis of the eluted peptides allow identification of the glycosylated sites. Determination of precise glycoforms present at specific glycosites on intact glycoprotein consists of a complex of various techniques and procedures including sophisticated fragmentation by collision-induced dissociation, or high-energy collision dissociation, or electron-transfer dissociation [61,64–67].

Although techniques for comprehensive site-specific characterization of NLG exist and have allowed biochemical verification of the glycans' presence and their relative abundance at some sites of IAV and IBV glycoproteins [54,68–72], until recently they represented a substantial analytical challenge. In 2018, Cao L. et al. [73] published a much less elaborate protocol for a semiquantitative MS-based method that promises to determine the degree of glycan occupancy at each glycosite and the proportion of N-glycans processed from high-mannose type to complex type. Introduction of this protocol into the ordinary practice of influenza laboratory will improve understanding of glycosylation-associated scientific data.

## Evolutionary dynamics of influenza virus HA and NA N-linked glycosylation

Contemporary human influenza virus strains have circulated in human populations for many decades, undergoing selection for resistance to human immunity as well as enhanced transmission during that period. Glycosylation of influenza virus HA, especially for A(H3N2) viruses, has been shown to have a major impact on antigenicity and is an important factor in antigenic drift [74]. However, increasing glycosylation of HA molecule has also been correlated with decreased virulence, a change in tropism from the lower to the upper RT, and diminished enhancement of secondary bacterial lung infections [75]. This suggests that increasing levels of glycosylation may both enhance influenza immune evasion in the presence of population adaptive immunity, and also reduce viral virulence or replication ability in non-immune individuals.

Different influenza strains have shown different patterns of glycosylation in their major surface proteins [76]. The HA of A(H3N2) IAV has shown a strong trend toward increasing numbers of glycans since its introduction into the human population in 1968 (Figure 2A,B). While the glycans on the stalk region have been quite constant for the past 50 years with five NLG sites at residues 24, 38, 54, 301, and 499 (numbering is based on the full-length protein), the globular head has undergone dramatic glycosylation modifications resulting in the loss and, more often, in the gain of glycosylation. The number of NLG sites on the influenza virus HA globular head has increased from two (at residues 97 and 181; site 97 was lost around 1975) on pandemic A(H3N2) IAV to up to nine (at residues 79, 97, 138, 142, 149, 160, 174, 181, and 262) on contemporary seasonal strains. The only new NLG site that has been acquired outside of the globular head was at residue 61, located between stalk and head regions.

The 1918 pandemic A(H1N1) IAV HA had six NLG sites (at residues 27, 28, 40, 304, 498, and 557) within the stalk region and only one (at residue 104) on the globular head of HA (Figure 2A,B). As with A(H3N2), the NLG sites on the HA stalk region of A(H1N1) IAV have been highly conserved, and subsequent glycan losses and gains have occurred within the globular head only. Like A(H3N2), A(H1N1) IAV showed a trend toward increasing glycan number on the globular head until its elimination in 1957 (Figure 2A), but after re-emerging in 1977 the number of glycans remained roughly constant until the virus was replaced by the 2009 A(H1N1)pdm09 pandemic virus (indicated with red dashed lines in Figure 2). This strain had evolved within swine for many decades and was antigenically and genetically more similar to very early human A(H1N1) strains than to the human seasonal A(H1N1) strains that it replaced. The number of NLG sites on human IBV HA has remained fairly constant at 10–12 sites since the split of Yamagata and Victoria lineages (Figure 2A,B) (indicated with blue dashed lines in Figure 2).

Changes in NA glycosylation have been less dramatic than in the HA. The 1918 pandemic A(H1N1) IAV NA had four NLG sites within the stalk region (at residues 50, 58, 63, and 68) and three within the globular head (at residues

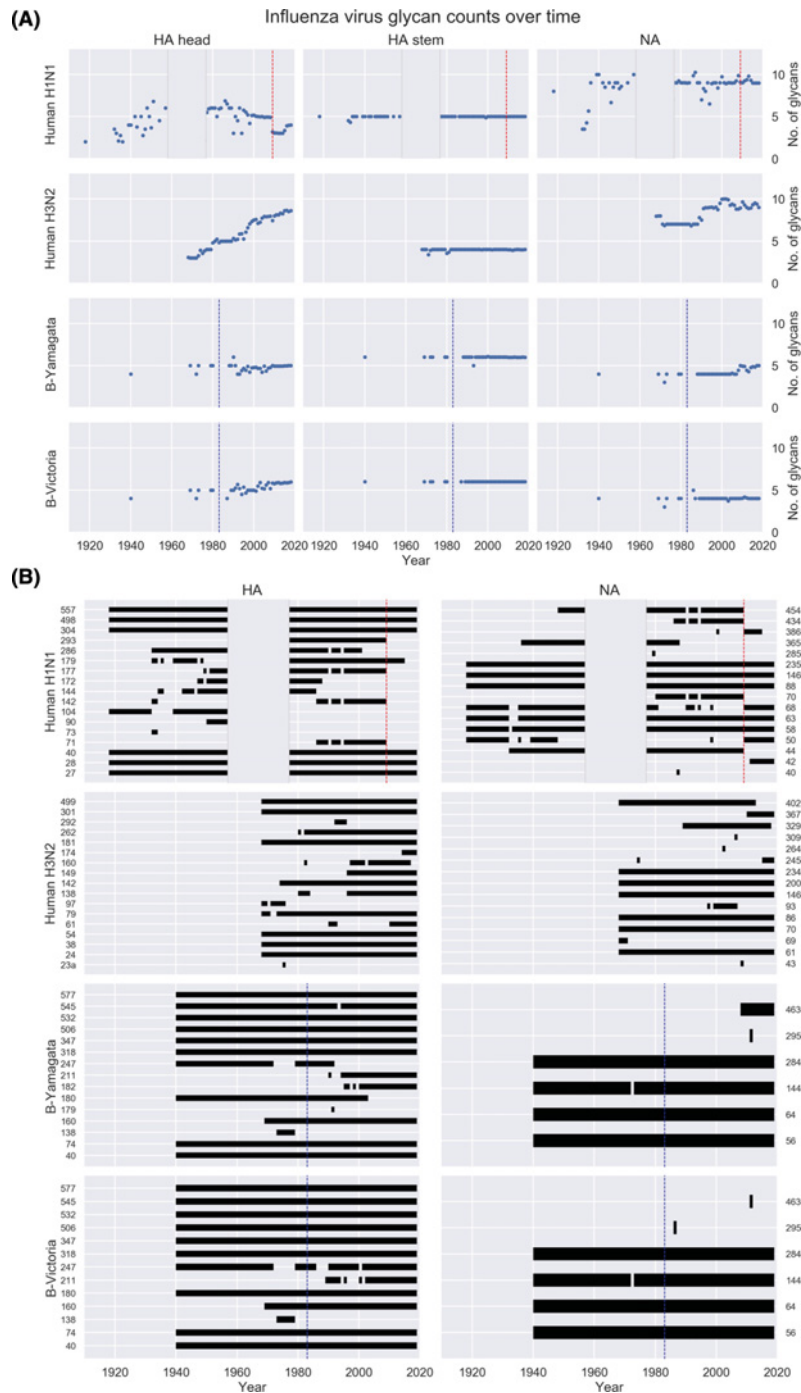

**Figure 2. Evolution of influenza virus N-linked glycosylation**

(A) Mean number per year of N-linked glycosylation (NLG) sites on the head and HA2 stem regions of HA, and on NA, from human isolates of A(H1N1) and A(H3N2), and B-Yamagata and B-Victoria lineages. (B) Residues of HA and NA from human A(H1N1) and A(H3N2) isolates on which more than 10% of isolates contained NLG. HA and NA sequences from human A(H1N1) and A(H3N2) isolates were downloaded from GISAID on September 6, 2018, manually curated to remove duplicates and laboratory variants, and aligned using MAFFT. Sites of potential NLG were identified based on sequence. The residue indicated as '23a' in A(H3N2) represents an insert relative to earlier HA isolates that was present in some viruses isolated in the 1970s. A(H1N1) viruses did not circulate among humans between 1957 and 1976, and those years are not shown. In 2009, indicated by red dashed lines, circulating seasonal A(H1N1) viruses were replaced by a novel pandemic A(H1N1)pdm09 strain. Influenza B viruses split into B-Yamagata and B-Victoria lineages in around 1983 [180]. Influenza B isolates from before 1983 are included in the charts for both lineages, and the date of divergence is indicated with blue dashed lines.

88, 146, and 235) (Figure 2A,B). While the stalk region of human IAV N1 maintained a roughly constant number of NLG sites, with sites 50 and 68 being replaced by those at residues 44 and 70, the globular head transiently added NLG at sites 365, 434, and 454. Similarly, the NA from A(H3N2) IAV and IBV have not shown obvious trends for increasing glycan count (Figure 2A,B).

## Influenza glycosylation and innate immune responses

As well as modulating recognition of glycoproteins by the adaptive immune system, glycans on influenza viruses are also important for interactions with the innate immune response. Innate responses are the first line of host defense against viral infection. This system relies on recognition of pathogen-associated molecular properties (PAMPs) that distinguish pathogen molecules from those of the host. For example, terminal mannose residues are features of influenza virus HA and NA, but are not typical of human glycoproteins. When such PAMPs are detected, host pattern recognition receptors (PRRs) are activated, leading to downstream effects that limit pathogen replication, recruit more innate immune cells, and induce and amplify adaptive immune responses, as outlined in detail in a recent review [77]. Although many antiviral PRRs are intracellular, a number of cell-surface and soluble molecules act as antiviral PRRs, and some of these are lectins (proteins containing carbohydrate or fibrinogen recognition domains [CRD and FBG, respectively]) that generate an antiviral effect through binding to either mannose, fucose or galactose derivatives on influenza virus HA and NA [78–83]. The presence and nature of glycans on influenza virus glycoproteins therefore influence the innate immune response to these pathogens.

### C-type lectins

Lectins that require calcium for binding are called C-type lectins [81,84]. These lectins can be present in serum and respiratory secretions as soluble molecules (collectins) or expressed on the surface of innate immune cells (endocytic lectins). The structure of a typical collectin includes an N-terminal cysteine-rich domain, a collagen-like domain (CLD), a neck region, and a CRD responsible for ligand binding [85]. Collectins include surfactant protein D (SP-D) and mannose-binding lectin (MBL), both of which have anti-influenza activity. Endocytic lectins implicated in anti-influenza activity include macrophage mannose receptor (MMR), macrophage galactose-type lectin (MGL), and DCs specific intercellular adhesion molecule-3-grabbing non-integrin (DC-SIGN).

#### Soluble C-type lectins (collectins)

SP-D is well conserved among mammals. It is synthesized by type II pneumocytes and is mainly present in pulmonary surfactant (the lipoprotein substance of the air–liquid interface in the alveoli of the lungs) of mammals including mice, ferrets, and humans [84]. It is also present in tear fluid of mice and humans and probably other mammals [86,87]. SP-D monomers (~130 kDa each) assemble into a 520 kDa tetrameric form, and further oligomerization of up to eight tetramers can occur, depending on species [88].

MBL is a complement protein that is produced and secreted by liver hepatocytes, and it is normally detected in serum [84]. MBL monomers of ~32 kDa oligomerize into trimeric to hexameric structures, with trimeric and tetrameric variants being the most usual physiological forms [89]. MBL is highly polymorphic in humans [90,91] resulting in variations in MBL serum levels [92], with ~10–30% of the global human population being MBL deficient [93]. Variations in MBL levels may contribute to individual responses and may partially explain inconsistent conclusions on the MBL role in infections. SP-D and MBL both preferentially bind mannose over the galactose-type sugars found on influenza virus HA and NA [83].

Both SP-D and MBL have been shown to protect against IAV infection in cell and animal models. SP-D has also shown the ability to neutralize IBV in tissue culture cells [94]. While the SP-D is recognized as a major component of the innate immune response to influenza, the role of MBL in protection against influenza is not as clear [95]. Different strains of influenza seem to have widely varying susceptibilities to SP-D and MBL, and at least part of this may be related to the number, location, and composition of glycans on HA. As noted above, reduced morbidity, mortality, and viral lung titers in mice and ferrets were observed with A(H1N1) and A(H3N2) IAV as the level of HA glycosylation increased [96–100]. Viruses that have low levels of glycosylation, such as the pandemic 1918 A(H1N1), 1957 A(H2N2), 1968 A(H3N2), and 2009 A(H1N1)pdm09 strains [96,98,101–106] and the zoonotic A(H5N1) [94,107–109] and A(H7N9) [110] strains, are relatively resistant to neutralization by SP-D and MBL in animal models, while highly glycosylated viruses are typically more susceptible [98,111–113].

Studies in mice show a rise in SP-D level in airways during influenza infection with either A(H1N1) or A(H3N2) IAV [96]. SP-D knockout mice show enhanced viral replication, lung inflammation, and morbidity after influenza

infection [98,100–115], while expression of SP-D variants corrected the defects in A(H3N2) virus clearance and inflammatory responses [97]. However, mice are not natural hosts for influenza. Ferrets are considered to be a better model for human influenza infection [116], but the role of SP-D in the ferret model of influenza infection is less clear. Although SP-D appears to reduce replication of highly glycosylated A(H3N2) virus in ferrets [104,111], it may not be a major factor in this model [105].

In mice, MBL was present in bronchoalveolar lavage fluid by day 3 after infection with the mouse-adapted A(H1N1) strain A/Puerto Rico/8/1934 (PR8) [96]. MBL-knockout mice showed increased susceptibility to infection with a PR8 reassortant expressing the NA and NP segments and the highly glycosylated HA from the A(H3N2) strain A/Philippines/82 [111], but infection of MBL-deficient mice with A(H1N1)pdm09 or avian A(H9N2) strains, which are less heavily glycosylated, resulted in reduced severity and inflammation than in wild-type mice [117].

In humans, evidence that collectins protect against influenza is mainly indirect. Decreased SP-D expression in human lungs has been associated with fatal A(H5N1) influenza cases [108]. SP-D deficient groups such as smokers and people with chronic obstructive pulmonary disease, cystic fibrosis, and diabetes often suffer from more severe seasonal influenza disease [118–121]. Reduced serum levels of MBL in children was correlated with enhanced severity of A(H1N1)pdm09 infection [122].

Collectins protect against influenza infection by several mechanisms. Direct binding to mannose residues on IAV HA [123,124] and NA [82] blocks virus–receptor interactions and entry and leads to aggregation of viral particles. As well, formation of collectin–virus complexes enhances phagocytosis and modulates inflammatory responses [82,101,123–127]. Collectins inhibit influenza virus NA activity not only through direct binding to glycoprotein, but also through steric hindrance of the NA active site by lectins bound to glycans on HA [82,96,123].

While SP-D is generally anti-inflammatory [128,129], MBL is mainly a pro-inflammatory protein. After binding to pathogens, MBL can activate the lectin complement pathway via MBL-associated serine proteases, leading to complement-mediated lysis and/or opsonophagocytosis [130,131]. MBL may therefore act through both complement-dependent and independent mechanisms to neutralize influenza virus [111,132].

Glycosylation on specific residues of HA is associated with increased susceptibility to SP-D for some A(H3N2) and A(H1N1) IAV strains. The presence of an NLG site at residue 181 [99,101,107,115] or 262 [99] on the globular head of HA appears to be important for efficient neutralization of A(H3N2) IAV by SP-D, while glycosylation on residues 104, 142, and 293 may be important for A(H1N1) [101,107,133,134]. The importance of particular glycan sites for collectin sensitivity seems to depend on the extent of glycosylation. For example, A(H3N2) from the 1968 pandemic, which has lower levels of glycosylation, and current seasonal strains both contain an NLG site at residue 181. However, the 1968 strain is relatively resistant to both SP-D and MBL, while contemporary strains are sensitive [96,98].

Interactions between SP-D and its target glycans on viruses are influenced by glycan composition. Factors affecting the composition of glycans on influenza glycoproteins are not well understood, but may also be important for lectin-based inhibition [135,136].

### **Endocytic C-type lectins**

Transmembrane C-type lectin receptors (CLRs) that recognize glycans of influenza virus HA and act as attachment/entry receptors are primarily expressed on alveolar and recruited macrophages, resident DCs, and B cells [20,22,23,137]. The importance of macrophages and DCs in host defense against IAV infection is well established [138,139]. Although it was thought that neither macrophages nor DCs can be productively infected with influenza virus, recent studies have shown productive infection of macrophages and DCs with A(H5N1) HPAI as well as A(H1N1) and A(H3N2) [20,140–143]. While seasonal influenza infection stimulates macrophage and DC chemokine and cytokine responses, leading to augmented immune responses, productive virus replication in these cell types may alter antiviral functions and enhance disease severity [144].

Transmembrane CLRs on macrophages include receptors that can recognize mannose, fucose, and *N*-acetyl-D-glycosamine (macrophage mannose receptor; MMR) or galactose (macrophage galactose-type lectin; MGL) on IAV [20,22]. As well, both macrophages and DCs have a receptor dendritic cell-specific ICAM3-grabbing integrin (DC-SIGN) for fucosylated and high-mannose oligosaccharides [23]. Alternative splicing generates several DC-SIGN isoforms, including both membrane-bound and soluble forms [145]. The role of soluble DC-SIGN in immune responses is not well understood. MMR and MGL are type I transmembrane proteins with several CRDs or CRD-like domains, and DC-SIGN is a type II membrane protein with a short amino terminal cytoplasmic tail, a neck region, and a single CRD.

Several studies have confirmed calcium-dependent lectin-mediated interactions between influenza and macrophages [20,22,25] and DC [21,23]. Such interactions could lead to infection of macrophages and DC, activation of these cell types, or both. While there is no direct evidence that CLR interactions with influenza are important for macrophage and DC activation, binding to endocytic CLR enhanced IAV infection of these cells [20–23,25]. For example, MMR or MGL on macrophages was shown to be principal co-receptors (along with SA-containing receptors) for A(H1N1) and A(H3N2) virus entry and infection [20,21,25]. DC-SIGN serves as an endocytic receptor for entry and infection with A(H1N1)pdm09 [138] and A(H3N2) IAV [146], and enhanced expression of DC-SIGN in activated B cells increases their susceptibility to HPAI A(H5N1) infection [147].

Virus uptake through CLRs depends on the level of influenza virus HA (but not NA) glycosylation [22]. Increased HA glycosylation, and glycosylation at specific positions, resulted in a higher level of influenza infection in both macrophages [20] and DCs [23,24,133]. Interaction between CLRs and glycans on HA may represent an important route for infection of macrophages and DCs immune cells with influenza viruses.

### Galectins

The galectins constitute a family of soluble, primarily mammalian, C-type lectins that are produced by various tissues, including airway epithelium and immune cells [148]. They are typically between 14 and 35 kDa and contain a conserved CRD of about 130 amino acids that exclusively bind  $\beta$ -galactosides (such as lactose [Gal $\beta$ (1–4)Glc] and N-acetylglucosamine [Gal $\beta$ (1–4)GlcNAc]) [148] of influenza virus HA. Currently, 15 galectins have been identified in mammals, although only galectins -1 through -10, -12 and -13 (Gal -1 – Gal-10, Gal-12, and Gal-13) are found in humans [149]. They have a wide range of functions including mediation of cell–cell interactions, cell–matrix adhesion, and transmembrane signaling.

The ability of galectins to bind terminal galactose residues on the surface of viruses (including influenza) and act as PRRs has been recently recognized [150,151]. The effect of galectins on influenza disease seems to depend on the type of galectin and on genetic variation as well as the virus strain. Gal-1 has been shown to inhibit A(H1N1), A(H2N2), A(H3N2), A(H5N2), A(H6N1), and A(H7N9) IAVs [151–153], while Gal-3 enhanced A(H5N1)-induced pulmonary inflammation [154] and Gal-9 reduced immune responses to both A(H1N1) and A(H3N2) IAVs [155]. Genetic variants of human Gal-1 that encode higher lectin expression conferred more protection against A(H7N9) IAV infection [153]. Intranasal treatment with Gal-1 significantly enhanced survival of mice challenged with a lethal dose of A(H1N1) IAV, and GAL-1-knockout mice were more susceptible to infection. Enhancement of galectin expression by IAV–infection was reported for both humans (Gal-9) [156] and mice (Gal-1 and Gal-3) [152–154].

Interactions between IAV and galectins may also promote disease under some conditions. Human Gal-1 and -8 promote IAV adhesion to the surface of the target-cell without affecting the internalization stage [157], and binding of A(H1N1) IAV to Gal-1 and -3 enhanced virus adhesion to and productive infection of airway epithelial cells, and increased galectin-mediated adhesion of *S. pneumoniae* [158], suggesting a possible role for galectins in secondary bacterial infections following influenza.

### Ficolins

Ficolins are a family of oligomeric soluble lectins with subunits consisting of CLD and fibrinogen-like domain (FBG) that are capable of interacting with glycans (including N-acetylglucosamine, fucose etc., but not mannose) on a variety of pathogens in both calcium-dependent and -independent ways [159]. Like MBL, ficolins initiate lectin-mediated complement activation. In humans, three types of ficolins (L, M, and H) have been described [160–163]. Ficolins L and H are mainly expressed by liver hepatocytes, while ficolin M is expressed by lungs, monocytes, and spleen [164–167]. H-ficolin is also expressed by type II alveolar and bronchial epithelial cells [167–170]. H-ficolin in human serum and BALF, and a purified recombinant variant, were shown to bind to IAV, block its HA activity, and inhibit replication of pandemic and seasonal IAVs in cell cultures [171]. Other studies have shown that H-ficolin and M-ficolin can inhibit replication of seasonal IAV in human monocytes [171,172]. Human L-ficolin and an L-ficolin-like molecule in mice were shown to bind HA and NA and inhibit IAV-infection both in tissue culture cells and mice [173].

## Concluding remarks

Lectins are ancient parts of the innate immune system that can bind glycans on viral glycoproteins, leading to direct viral neutralization and to priming the immune system to enhance viral clearance. Unlike most antibodies, lectins can bind to a wide range of influenza strains, making them attractive candidates for antiviral therapies.

For example, engineered human SP-D enhanced IAV binding and clearance and murine survival *in vivo* [174]. A recombinant fragment of human SP-D, containing only neck and CRD regions, showed ability to act as virus entry inhibitor as well as ability to down-regulate excessive virus-induced pro-inflammatory responses [175]. Recombinant



porcine SP-D (either as the intact protein or as a fragment containing the neck and CRD only) inhibited IAV and IBV infection in epithelial cells of human trachea [94] and A(H3N2) IAV in *ex vivo* cultures of respiratory tract tissue [176,177], and was more effective than recombinant human SP-D.

MBL has also exhibited therapeutic potential with recombinant chimeric versions inhibiting IAV both *in vitro* (through complement activation and induction of viral aggregation [178]) and in mice (in part, by balancing cytokine and inflammatory responses [179]).

Despite the progress achieved in the field of influenza innate immunity in recent years, our understanding of the interactions between lectin, influenza, and host dynamics is incomplete. A better understanding of these relationships could lead to novel therapeutic and immunomodulatory approaches for the treatment of influenza disease.

## Acknowledgments

We thank Dr Terry Tumpey of Influenza Division of National Center for Immunization and Respiratory Diseases, Centers for Disease Control and Prevention for helpful discussions. The findings and conclusions in this report are those of the authors and do not necessarily represent the official position of the Centers for Disease Control and Prevention or funding agency.

## Competing Interests

The authors declare that there are no competing interests associated with the manuscript.

## Abbreviations

CLD, collagen-like domain; CLR, C-type lectin receptor; ER, endoplasmic reticulum; FBG, fibrinogen-like domain; HA, hemagglutinin; IAV, influenza A virus; IBV, influenza B virus; ICV, influenza C virus; MBL, mannose-binding lectin; MGL, macrophage galactose-type lectin; MMR, macrophage mannose receptor; NA, neuraminidase; NLG, N-linked glycosylation; PAMP, pathogen-associated molecular property; PRR, pattern recognition receptor; RT, respiratory tract; SP-D, surfactant protein D.

## References

- 1 Morens, D.M., Taubenberger, J.K., Folkers, G.K. and Fauci, A.S. (2010) Pandemic influenza's 500th anniversary. *Clin. Infect. Dis.* **51**, 1442–1444, <https://doi.org/10.1086/657429>
- 2 Webster, R.G., Bean, W.J., Corman, O.T., Chambers, T.M. and Kawaoka, Y. (1992) Evolution and ecology of influenza A viruses. *Microbiol. Rev.* **56**, 152–179
- 3 McCullers, J.A. and Hayden, F.G. (2012) Fatal influenza B infections: time to reexamine influenza research priorities. *J. Infect. Dis.* **205**, 870–872, <https://doi.org/10.1093/infdis/jir865>
- 4 Taylor, R.M. (1949) Studies on survival of influenza virus between epidemics and antigenic variants of the virus. *Am. J. Public Health Nations Health* **39**, 171–178, <https://doi.org/10.2105/AJPH.39.2.171>
- 5 Parrish, C.R., Murcia, P.R. and Holmes, E.C. (2015) Influenza virus reservoirs and intermediate hosts: dogs, horses, and new possibilities for influenza virus exposure to humans. *J. Virol.* **89**, 2990–2994, <https://doi.org/10.1128/JVI.03146-14>
- 6 Osterhaus, A.D., Rimmelzwaan, G.F., Martina, B.E., Bestebroer, T.M. and Fouchier, R.A. (2000) Influenza B virus in seals. *Science* **288**, 1051–1053, <https://doi.org/10.1126/science.288.5468.1051>
- 7 Yuanji, G., Fengen, J. and Ping, W. (1983) Isolation of influenza C virus from pigs and experimental infection of pigs with influenza C virus. *J. Gen. Virol.* **64**, 177–182, <https://doi.org/10.1099/0022-1317-64-1-177>
- 8 Ohwada, K., Kitame, F. and Homma, M. (1998) Experimental infections of dogs with type C influenza virus. *Microbiol. Immunol.* **30**, 451–460, <https://doi.org/10.1111/j.1348-0421.1986.tb02971.x>
- 9 Taubenberger, J.K. and Kash, J.C. (2010) Influenza virus evolution, host adaptation, and pandemic formation. *Cell Host Microbe* **7**, 440–451, <https://doi.org/10.1016/j.chom.2010.05.009>
- 10 Hayward, A.C., Frigaszy, E.B., Bermingham, A., Wang, L., Copas, A., Edmunds, W.J. et al. (2014) Comparative community burden and severity of seasonal and pandemic influenza: results of the Flu Watch cohort study. *Lancet Respir. Med.* **2**, 445–454, [https://doi.org/10.1016/S2213-2600\(14\)70034-7](https://doi.org/10.1016/S2213-2600(14)70034-7)
- 11 Horby, P.W. (2014) Community studies of influenza: new knowledge, new questions. *Lancet Respir. Med.* **2**, 430–431, [https://doi.org/10.1016/S2213-2600\(14\)70053-0](https://doi.org/10.1016/S2213-2600(14)70053-0)
- 12 Peiris, M. and Yen, H.L. (2014) Animal and human influenzas. *Rev. Sci. Tech.* **33**, 539–553, <https://doi.org/10.20506/rst.33.2.2289>
- 13 Short, K.R., Richard, M., Verhagen, J.H., van Riel, D., Schrauwen, E.J.A., van den Brand, J.M.A. et al. (2015) One health, multiple challenges: the inter-species transmission of influenza A virus. *One Health* **1**, 1–13, <https://doi.org/10.1016/j.onehlt.2015.03.001>
- 14 Glezen, P.W., Schmier, J.K., Kuehn, C.M., Ryan, K.J. and Oxford, J. (2013) The burden of influenza B: a structured literature review. *Am. J. Public Health* **103**, e43–e51
- 15 Brottet, E., Vandroux, D., Gauzere, B.A., Antok, E., Jaffar-Bandjee, M.C., Michault, A. et al. (2014) Influenza season in Réunion dominated by influenza B virus circulation associated with numerous cases of severe disease, France, 2014. *Euro Surveill.* **19**

- 16 Glezen, W.P. (2008) Clinical practice. Prevention and treatment of seasonal influenza. *N. Engl. J. Med.* **359**, 2579–2585, <https://doi.org/10.1056/NEJMc0807498>
- 17 Joosting, A.C., Head, B., Bynoe, M.L. and Tyrrell, D.A. (1968) Production of common colds in human volunteers by influenza C virus. *Br. Med. J.* **4**, 153–154, <https://doi.org/10.1136/bmj.4.5624.153>
- 18 Wright, P.F., Neumann, G. and Kawaoka, Y. (2013) Orthomyxoviruses. In *Fields Virology*, 6th edn, (Knipe, D.M. and Howley, P.M., eds), pp. 1186–1243, Lippincott/The Williams & Wilkins, a Wolters Kluwer business, Philadelphia, PA
- 19 Rogers, G.N. and D'Souza, B.L. (1989) Receptor binding properties of human and animal H1 influenza virus isolates. *Virology* **173**, 317–322, [https://doi.org/10.1016/0042-6822\(89\)90249-3](https://doi.org/10.1016/0042-6822(89)90249-3)
- 20 Reading, P.C., Miller, J.L. and Anders, E.M. (2000) Involvement of the mannose receptor in infection of macrophages by influenza virus. *J. Virol.* **74**, 5190–5197, <https://doi.org/10.1128/JVI.74.11.5190-5197.2000>
- 21 Wang, S.-F., Huang, J.C., Lee, Y.-M., Liu, S.-J., Chan, Y.-J., Chau, Y.-P. et al. (2008) DC-SIGN mediates avian H5N1 influenza virus infection in cis and in trans. *Biochem. Biophys. Res. Commun.* **373**, 561–566, <https://doi.org/10.1016/j.bbrc.2008.06.078>
- 22 Upham, J.P., Pickett, D., Irimura, T., Anders, E.M. and Reading, P.C. (2010) Macrophage receptors for influenza A virus: role of the macrophage galactose-type lectin and mannose receptor in viral entry. *J. Virol.* **84**, 3730–3737, <https://doi.org/10.1128/JVI.02148-09>
- 23 Londrigan, S.L., Turville, S.G., Tate, M.D., Deng, Y.M., Brooks, A.G. and Reading, P.C. (2011) N-linked glycosylation facilitates sialic acid-independent attachment and entry of influenza A viruses into cells expressing DC-SIGN or L-SIGN. *J. Virol.* **85**, 2990–3000, <https://doi.org/10.1128/JVI.01705-10>
- 24 Hillaire, M.L.B., Nieuwkoop, N.J., Boon, A.C.M., de Mutser, G., Vogelzangvan Trierum, S.E., Fouchier, R.A.M. et al. (2013) Binding of DC-SIGN to the hemagglutinin of influenza A viruses supports virus replication in DC-SIGN expressing cells. *PLoS One* **8**, e56164, <https://doi.org/10.1371/journal.pone.0056164>
- 25 Ng, W.C., Liong, S., Tate, M.D., Irimura, T., Denda-Nagai, K., Brooks, A.G. et al. (2014) The macrophage galactose-type lectin can function as an attachment and entry receptor for influenza virus. *J. Virol.* **88**, 1659–1672, <https://doi.org/10.1128/JVI.02014-13>
- 26 Ng, W.C., Londrigan, S.L., Nasr, N., Cunningham, A.L., Turville, S., Brooks, A.G. et al. (2016) The C-type lectin langerin functions as a receptor for attachment and infectious entry of influenza A virus. *J. Virol.* **90**, 206–221, <https://doi.org/10.1128/JVI.01447-15>
- 27 Saito, T., Taylor, G. and Webster, R.G. (1995) Steps in maturation of influenza virus neuraminidase. *J. Virol.* **69**, 5011–5017
- 28 Varghese, J.N. and Colman, P.M. (1991) Three-dimensional structure of the neuraminidase of influenza virus A/Tokyo/3/67 and 2.2 Å resolution. *J. Mol. Biol.* **221**, 473–486, [https://doi.org/10.1016/0022-2836\(91\)80068-6](https://doi.org/10.1016/0022-2836(91)80068-6)
- 29 Luo, M. (2012) Influenza virus entry. *Adv. Exp. Med. Biol.* **726**, 201–221, [https://doi.org/10.1007/978-1-4614-0980-9\\_9](https://doi.org/10.1007/978-1-4614-0980-9_9)
- 30 Cohen, M., Zhang, X.Q., Senaati, H.P., Chen, H.W., Varki, N.M., Schooley, R.T. et al. (2013) Influenza A penetrates host mucus by cleaving sialic acids with neuraminidase. *Virology* **10**, 321, <https://doi.org/10.1186/1743-422X-10-321>
- 31 Webster, R.G. and Govorkova, E.A. (2014) Continuing challenges in influenza. *Ann. N.Y. Acad. Sci.* **1323**, 115–139, <https://doi.org/10.1111/nyas.12462>
- 32 Johnson, N.P. and Mueller, J. (2002) Updating the accounts: global mortality of the 1918–1920 “Spanish” influenza pandemic. *Bull. Hist. Med.* **76**, 105–115, <https://doi.org/10.1353/bhm.2002.0022>
- 33 Doshi, P. (2008) Trends in recorded influenza mortality: United States, 1900–2004. *Am. J. Public Health* **98**, 939–945
- 34 Kilbourne, E.D., Johansson, B.E. and Grais, R. (1990) Independent and disparate evolution in nature of influenza A virus hemagglutinin and neuraminidase glycoproteins. *Proc. Natl. Acad. Sci. U.S.A.* **87**, 786–790, <https://doi.org/10.1073/pnas.87.2.786>
- 35 Suzuki, Y. (2005) Sialobiology of influenza: molecular mechanism of host range variation of influenza viruses. *Biol. Pharm. Bull.* **28**, 399–408, <https://doi.org/10.1248/bpb.28.399>
- 36 Roberts, P.C., Garten, W. and Klenk, H.D. (1993) Role of conserved glycosylation sites in maturation and transport of influenza virus hemagglutinin. *J. Virol.* **67**, 3048–3060
- 37 Ohuchi, R., Ohuchi, M., Garten, W. and Klenk, H.D. (1997) Oligosaccharides in the stem region maintain the influenza virus hemagglutinin in the metastable form required for fusion activity. *J. Virol.* **71**, 3719–3725
- 38 Tsuchiya, E., Sugawara, K., Hongo, S., Matsuzaki, Y., Muraki, Y. and Nakamura, K. (2002) Role of overlapping glycosylation sequons in antigenic properties, intracellular transport and biological activities of influenza A/H2N2 virus hemagglutinin. *J. Gen. Virol.* **83**, 3067–3074, <https://doi.org/10.1099/0022-1317-83-12-3067>
- 39 Ohuchi, M., Ohuchi, R., Feldmann, A. and Klenk, H.D. (1997) Regulation of receptor binding affinity of influenza virus hemagglutinin by its carbohydrate moiety. *J. Virol.* **71**, 8377–8377
- 40 Gambaryan, A.S., Marinina, V.P., Tuzikov, A.B., Bovin, N.V., Rudneva, I.A., Sinitsyn, B.V. et al. (1998) Effects of host-dependent glycosylation of hemagglutinin on receptor-binding properties of H1N1 human influenza A virus grown in MDCK cells and in embryonated eggs. *Virology* **247**, 170–177, <https://doi.org/10.1006/viro.1998.9224>
- 41 Alymova, I.V., York, I.A., Air, G.M., Cipollo, J.F., Gulati, S., Baranovich, T. et al. (2016) Glycosylation changes in the globular head of H3N2 influenza hemagglutinin modulate receptor binding without affecting virus virulence. *Sci. Rep.* **6**, 36216, <https://doi.org/10.1038/srep36216>
- 42 Deshpande, K.L., Fried, V.A., Ando, M. and Webster, R.G. (1987) Glycosylation affects cleavage of an H5N2 influenza virus hemagglutinin and regulates virulence. *Proc. Natl. Acad. Sci. U.S.A.* **84**, 36–40, <https://doi.org/10.1073/pnas.84.1.36>
- 43 Ohuchi, M., Orlich, M., Ohuchi, R., Simpson, B.E., Garten, W., Klenk, H.D. et al. (1989) Mutations at the cleavage site of the hemagglutinin alter the pathogenicity of influenza virus A/chick/Penn/83 (H5N2). *Virology* **168**, 274–280, [https://doi.org/10.1016/0042-6822\(89\)90267-5](https://doi.org/10.1016/0042-6822(89)90267-5)
- 44 Wagner, R., Wolff, T., Herwig, A., Pleschka, S. and Klenk, H.D. (2000) Interdependence of hemagglutinin glycosylation and neuraminidase as regulators of influenza virus growth: a study by reverse genetics. *J. Virol.* **74**, 6316–6323, <https://doi.org/10.1128/JVI.74.14.6316-6323.2000>
- 45 Li, S., Schulman, J., Itamura, S. and Palese, P. (1993) Glycosylation of neuraminidase determines the neurovirulence of influenza A/WSN/33 virus. *J. Virol.* **67**, 6667–6673

- 46 Kornfeld, R. and Kornfeld, S. (1985) Assembly of asparagine-linked oligosaccharides. *Annu. Rev. Biochem.* **54**, 631–664, <https://doi.org/10.1146/annurev.bi.54.070185.003215>
- 47 Basak, S., Pritchard, D.G., Bhowan, A.S. and Compans, R.W. (1981) Glycosylation sites of influenza viral glycoproteins: Characterization of tryptic glycoproteins from the A/USSR(H1N1) hemagglutinin protein. *J. Virol.* **37**, 549–558
- 48 Ward, C.W. and Dopheide, T.A. (1991) Amino acid sequence and oligosaccharide distribution of the haemagglutinin from an early Hong Kong influenza virus variant A/Aichi/2/68 (X-31). *Biochem. J.* **193**, 953–962, <https://doi.org/10.1042/bj1930953>
- 49 Schwarz, F. and Aebi, M. (2011) Mechanisms and principles of N-linked protein glycosylation. *Curr. Opin. Struct. Biol.* **21**, 576–582, <https://doi.org/10.1016/j.sbi.2011.08.005>
- 50 Basak, S., Tomana, M. and Compans, R.W. (1985) Sialic acid is incorporated into influenza hemagglutinin glycoproteins in the absence of viral neuraminidase. *Virus Res.* **2**, 61–68, [https://doi.org/10.1016/0168-1702\(85\)90060-7](https://doi.org/10.1016/0168-1702(85)90060-7)
- 51 Kasturi, L., Eshleman, J.R., Wunner, W.H. and Shakin-Eshleman, S.H. (1995) The hydroxy amino acid in Asn-X-Ser/Thr sequon can influence N-linked core glycosylation efficiency and the level of expression of a cell surface glycoprotein. *J. Biol. Chem.* **270**, 14756–14761, <https://doi.org/10.1074/jbc.270.24.14756>
- 52 Mellquist, J.L., Kasturi, L., Spitalnik, S.L. and Shakin-Eshleman, S.H. (1998) The amino acid following an Asn-X-Ser/Thr sequon is an important determinant of N-linked core glycosylation efficiency. *Biochem.* **37**, 6833–6837, <https://doi.org/10.1021/bi972217k>
- 53 Blake, T.A., Williams, T.L., Pirkle, J.L. and Barr, J.R. (2009) Targeted N-linked glycosylation analysis of H5N1 influenza hemagglutinin by selective sample preparation and liquid chromatography/tandem mass spectrometry. *Anal. Chem.* **81**, 3109–3118, <https://doi.org/10.1021/ac900095h>
- 54 An, Y., McCullers, J.A., Alymova, I., Parson, L.M. and Cipollo, J.F. (2015) Glycosylation analysis of engineered H3N2 influenza A virus hemagglutinins with sequentially added historically relevant glycosylation sites. *J. Proteome Res.* **14**, 3957–3969, <https://doi.org/10.1021/acs.jproteome.5b00416>
- 55 Harvey, D.J. (2018) Mass spectrometric analysis of glycosylated viral proteins. *Expert Rev. Proteomic.* **15**, 391–412, <https://doi.org/10.1080/14789450.2018.1468756>
- 56 Ashline, D., Singh, S., Hanneman, A. and Reinhold, V. (2005) Congruent strategies for carbohydrate sequencing. 1. Mining structural details by MSn. *Anal. Chem.* **77**, 6250–6262, <https://doi.org/10.1021/ac050724z>
- 57 Zaia, J. (2008) Mass spectrometry and the emerging field of glycomics. *Chem. Biol.* **15**, 881–892, <https://doi.org/10.1016/j.chembiol.2008.07.016>
- 58 Kolarich, D., Jensen, P.H., Altmann, F. and Packer, N.H. (2012) Determination of site-specific glycan heterogeneity on glycoproteins. *Nat. Protoc.* **7**, 1285–1298, <https://doi.org/10.1038/nprot.2012.062>
- 59 Bones, J., Mittermayr, S., O'Donoghue, N., Guttman, A. and Rudd, P.M. (2010) Ultra performance liquid chromatographic profiling of serum N-Glycans for fast and efficient identification of cancer associated alterations in glycosylation. *Anal. Chem.* **82**, 10208–10215, <https://doi.org/10.1021/ac102860w>
- 60 Zauner, G., Deelder, A.M. and Wuhrer, M. (2011) Recent advances in hydrophilic interaction liquid chromatography (HILIC) for structural glycomics. *Electrophor.* **32**, 3456–3466, <https://doi.org/10.1002/elps.201100247>
- 61 Kaji, H., Saito, H., Yamauchi, Y., Shinkawa, T., Taoka, M., Hirabayashi, J. et al. (2003) Lectin affinity capture, isotope-coded tagging and mass spectrometry to identify N-linked glycoproteins. *Nat. Biotechnol.* **21**, 667–672, <https://doi.org/10.1038/nbt829>
- 62 Zhang, H., Li, X.J., Martin, D.B. and Aebersold, R. (2003) Identification and quantification of N-linked glycoproteins using hydrazide chemistry, stable isotope labeling and mass spectrometry. *Nat. Biotechnol.* **21**, 660–666, <https://doi.org/10.1038/nbt827>
- 63 Wada, Y., Tajiri, M. and Yoshida, S. (2004) Hydrophilic affinity isolation and MALDI multiple-stage tandem mass spectrometry of glycopeptides for glycoproteomics. *Anal. Chem.* **76**, 6560–6565, <https://doi.org/10.1021/ac049062o>
- 64 Cao, L., Yu, L., Guo, Z., Shen, A., Guo, Y. and Liang, X. (2014) N-glycosylation site analysis of proteins from *Saccharomyces cerevisiae* by using hydrophilic interaction liquid chromatography-based enrichment, parallel deglycosylation, and mass spectrometry. *J. Proteome Res.* **13**, 1485–1493, <https://doi.org/10.1021/pr401049e>
- 65 Khatri, K., Klein, J.A., White, M.R., Grant, O.C., Leymarie, N., Woods, R.J. et al. (2016) Integrated omics and computational glycomics reveal structural basis for influenza A virus glycan microheterogeneity and host interactions. *Mol. Cell. Proteomics* **15**, 1895–1912, <https://doi.org/10.1074/mcp.M116.058016>
- 66 Sun, S., Shah, P., Eshghi, S.T., Yang, W., Trikanand, N., Yang, S. et al. (2016) Comprehensive analysis of protein glycosylation by solid-phase extraction of N-linked glycans and glycosite-containing peptides. *Nat. Biotechnol.* **34**, 84–88, <https://doi.org/10.1038/nbt.3403>
- 67 Thaysen-Andersen, M., Packer, N.H. and Schulz, B.L. (2016) Maturing glycoproteomics technologies provide unique structural insights into the N-glycoproteome and its regulation in health and disease. *Mol. Cell. Proteomics* **15**, 1773–1790, <https://doi.org/10.1074/mcp.0115.057638>
- 68 An, Y. and Cipollo, J.F. (2011) An unbiased approach for analysis of protein glycosylation and application to influenza vaccine hemagglutinin. *Anal. Biochem.* **415**, 67–80, <https://doi.org/10.1016/j.ab.2011.04.018>
- 69 Jayaraman, A., Koh, X., Li, J., Raman, R., Viswanathan, K., Shriver, Z. et al. (2012) Glycosylation at Asn91 of H1N1 haemagglutinin affects binding to glycan receptors. *Biochem. J.* **444**, 429–435, <https://doi.org/10.1042/BJ20112101>
- 70 An, Y., Rininger, J.A., Jarvis, D.L., Jing, X., Ye, Z., Aumiller, J.J. et al. (2013) Comparative glycomics analysis of influenza Hemagglutinin (H5N1) produced in vaccine relevant cell platforms. *J. Proteome Res.* **12**, 3707–3720, <https://doi.org/10.1021/pr400329k>
- 71 Chen, W., Zhong, Y., Su, R., Qi, H., Deng, W., Sun, Y. et al. (2017) N-glycan profiles in H9N2 avian influenza viruses from chicken eggs and human embryonic lung fibroblast cells. *J. Virol. Methods* **249**, 10–20, <https://doi.org/10.1016/j.jviromet.2017.08.002>
- 72 Cruz, E., Cain, J., Crossett, B. and Kayser, V. (2018) Site-specific glycosylation profile of influenza A (H1N1) hemagglutinin through tandem mass spectrometry. *Hum. Vaccin. Immunother.* **14**, 508–517, <https://doi.org/10.1080/21645515.2017.1377871>
- 73 Cao, L., Diedrich, J.K., Ma, Y., Wang, N., Pauthner, M., Park, S.-K.R. et al. (2018) Global site-specific analysis of glycoprotein N-glycan processing. *Nat. Protoc.* **13**, 1196–1212, <https://doi.org/10.1038/nprot.2018.024>

- 74 Skehel, J.J., Stevens, D.J., Daniels, R.S., Douglas, A.R., Knossow, M., Wilson, I.A. et al. (1984) A carbohydrate side chain on hemagglutinins of Hong Kong influenza viruses inhibits recognition by a monoclonal antibody. *Proc. Natl. Acad. Sci. U.S.A.* **81**, 1779–1783, <https://doi.org/10.1073/pnas.81.6.1779>
- 75 McCullers, J.A. (2014) The co-pathogenesis of influenza viruses with bacteria in the lung. *Nat. Rev. Microbiol.* **12**, 252–262, <https://doi.org/10.1038/nrmicro3231>
- 76 Kim, P., Jang, Y.H., Kwon, S.B., Lee, C.M., Han, G. and Seong, B.L. (2018) Glycosylation of hemagglutinin of influenza A virus as a signature for ecological spillover and adaptation among influenza reservoirs. *Viruses* **10**, 183, <https://doi.org/10.3390/v10040183>
- 77 Tripathi, S., White, M.R. and Hartshorn, K.L. (2015) The amazing innate immune response to influenza A virus infection. *Innate Immun.* **21**, 73–98, <https://doi.org/10.1177/1753425913508992>
- 78 Gottschalk, A., Belyavin, G. and Biddle, F. (1972) Glycoproteins as influenza virus hemagglutinin inhibitors and as cellular receptors. In *Glycoproteins. Their Composition, Structure and Function* (Gottschalk, A., ed.), pp. 1082–1096, Elsevier Science Publishing, New York, NY, U.S.A.
- 79 Anders, E.M., Hartley, C.A. and Jackson, D.C. (1990) Bovine and mouse serum beta inhibitors of influenza A viruses are mannose-binding lectins. *Proc. Natl. Acad. Sci. U.S.A.* **87**, 4485–4489, <https://doi.org/10.1073/pnas.87.12.4485>
- 80 Hartley, C.A., Jackson, D.C. and Anders, E.M. (1992) Two distinct serum mannose-binding lectins function as beta inhibitors of influenza virus: Identification of bovine sera beta inhibitors as conglutinin. *J. Virol.* **66**, 4358–4363
- 81 Drickamer, K. (1999) C-type lectin-like domains. *Curr. Opin. Struct. Biol.* **9**, 585–590, [https://doi.org/10.1016/S0959-440X\(99\)00009-3](https://doi.org/10.1016/S0959-440X(99)00009-3)
- 82 Tecle, T., White, M.R., Crouch, E.C. and Hartshorn, K.L. (2007) Inhibition of influenza viral neuraminidase activity by collectins. *Arch. Virol.* **152**, 1731–1742, <https://doi.org/10.1007/s00705-007-0983-4>
- 83 Veldhuizen, E.J.A., van Eijk, M. and Haagsman, H.P. (2011) The carbohydrate recognition domain of collectins. *FEBS J.* **278**, 3930–3941, <https://doi.org/10.1111/j.1742-4658.2011.08206.x>
- 84 Drickamer, K. (1988) Two distinct classes of carbohydrate-recognition domains in animal lectins. *J. Biologic. Chem.* **263**, 9557–9560
- 85 Jensen, P.H., Weilguny, D., Matthesen, F., McGuire, K.A., Shi, L. and Hojrup, P. (2005) Characterization of the oligomer structure of recombinant human mannan-binding lectin. *J. Biol. Chem.* **280**, 11043–11051, <https://doi.org/10.1074/jbc.M412472200>
- 86 Akiyama, J., Hoffman, A., Brown, C., Allen, L., Edmondson, J., Poulain, F. et al. (2002) Tissue distribution of surfactant proteins A and D in the mouse. *J. Histochem. Cytochem.* **50**, 993–996, <https://doi.org/10.1177/002215540205000713>
- 87 Ni, M., Evans, D.J., Hawgood, S., Anders, E.M., Sack, R.A. and Fleiszig, S.M.J. (2005) Surfactant protein D is present in human tear fluid and the cornea and inhibits epithelial cell invasion by *Pseudomonas aeruginosa*. *Infect. Immun.* **74**, 2147–2156, <https://doi.org/10.1128/IAI.73.4.2147-2156.2005>
- 88 Kishore, U., Greenhough, T.J., Waters, P., Shrive, A.K., Chai, R., Kamran, M.F. et al. (2006) Surfactant proteins SP-A and SP-D: Structure, function and receptors. *Mol. Immunol.* **43**, 1293–1315, <https://doi.org/10.1016/j.molimm.2005.08.004>
- 89 Jensenius, H., Klein, D.C., van Hecke, M., Oosterkamp, T.H., Schmidt, T. and Jensenius, J.C. (2009) Mannan-binding lectin: Structure, oligomerization, and flexibility studied by atomic force microscopy. *J. Mol. Biol.* **391**, 246–259, <https://doi.org/10.1016/j.jmb.2009.05.083>
- 90 Madsen, H.O., Garred, P., Kurtzhals, J.A., Lamm, L.U., Ryder, L.P., Thiel, S. et al. (1994) A new frequent allele is the missing link in the structural polymorphism of the human mannan-binding protein. *Immunogenetics* **40**, 37–44, <https://doi.org/10.1007/BF00163962>
- 91 Madsen, H.O., Satz, M.L., Høgh, B., Svejgaard, A. and Garred, P. (1998) Different molecular events result in low protein levels of mannan-binding lectin in populations from southeast Africa and South America. *J. Immunol.* **161**, 3169–3175
- 92 Lipscombe, R.J., Sumiya, M., Summerfield, J.A. and Turner, M.W. (1995) Distinct physicochemical characteristics of human mannose binding protein expressed by individuals of differing genotype. *Immunology* **85**, 660–667
- 93 Chalmers, J.D., McHugh, B.J., Doherty, C., Smith, M.P., Govan, J.R., Kilpatrick, D.C. et al. (2013) Mannose-binding lectin deficiency and disease severity in non-cystic fibrosis bronchiectasis: a prospective study. *Lancet Respir. Med.* **1**, 224–232, [https://doi.org/10.1016/S2213-2600\(13\)70001-8](https://doi.org/10.1016/S2213-2600(13)70001-8)
- 94 Hillaire, M.L., van Eijk, M., Vogelzang-van Trierum, S.E., Nieuwkoop, N.J., van Riel, D., Fouchier, R.A. et al. (2015) Assessment of the antiviral properties of recombinant surfactant protein D against B viruses in vitro. *Virus Res.* **2**, 43–46, <https://doi.org/10.1016/j.virusres.2014.08.019>
- 95 Wu, W. and Metcalf, J.P. (2014) Editorial: mannose-binding lectin in fighting influenza: promise or peril? *J. Leuk. Biol.* **95**, 702–704, <https://doi.org/10.1189/jlb.0114003>
- 96 Reading, P.C., Morey, L.S., Crouch, E.C. and Anders, E.M. (1997) Collectin-mediated antiviral host defense in the lung: evidence from influenza virus infection in mice. *J. Virol.* **71**, 8204–8212
- 97 Kingma, P.S., Zhang, L., Ikegami, M., Hartshorn, K., McCormack, F.X. and Whitsett, J.A. (2006) Correction of pulmonary abnormalities in Sftpd<sup>-/-</sup> mice requires the collagenous domain of surfactant protein D. *J. Biol. Chem.* **281**, 24496–24505, <https://doi.org/10.1074/jbc.M600651200>
- 98 Vigerust, D.J., Ulett, K.B., Boyd, K.L., Madsen, J., Hawgood, S. and McCullers, J.A. (2007) N-linked glycosylation attenuates H3N2 influenza viruses. *J. Virol.* **81**, 8593–8600, <https://doi.org/10.1128/JVI.00769-07>
- 99 Tate, M.D., Job, E.R., Brooks, A.G. and Reading, P.C. (2011) Glycosylation of the hemagglutinin modulates the sensitivity of H3N2 influenza viruses to innate proteins in airway secretions and virulence in mice. *Virology* **413**, 84–92, <https://doi.org/10.1016/j.virol.2011.01.036>
- 100 Wanzeck, K., Boyd, K.L. and McCullers, J.A. (2011) Glycan shielding of the influenza virus hemagglutinin contributes to immunopathology in mice. *Am. J. Respir. Crit. Care Med.* **183**, 767–773, <https://doi.org/10.1164/rccm.201007-11840C>
- 101 Job, E.R., Deng, Y.M., Tate, M.D., Bottazzi, B., Crouch, E.C., Dean, M.M. et al. (2010) Pandemic H1N1 influenza A viruses are resistant to the antiviral activities of innate immune proteins of the collectin and pentraxin superfamilies. *J. Immunol.* **185**, 4284–4291, <https://doi.org/10.4049/jimmunol.1001613>
- 102 Qi, L., Kash, J.C., Dugan, V.G., Jagger, B.W., Lau, Y.F., Sheng, Z.M. et al. (2011) The ability of pandemic influenza virus hemagglutinins to induce lower respiratory pathology is associated with decreased surfactant protein D binding. *Virology* **412**, 426–434, <https://doi.org/10.1016/j.virol.2011.01.029>

- 103 Tokunaga, H., Ushirogawa, H. and Ohuchi, M. (2011) The pandemic (H1N1) 2009 influenza virus is resistant to mannose-binding lectin. *Viol. J.* **8**, 50, <https://doi.org/10.1186/1743-422X-8-50>
- 104 Cheng, X., Zengel, J.R., Xu, Q. and Jin, H. (2012) Surface glycoproteins of influenza A H3N2 virus modulate virus replication in the respiratory tract of ferrets. *Virology* **432**, 91–98, <https://doi.org/10.1016/j.virol.2012.06.002>
- 105 Job, E.R., Pizzolla, A., Nebel, T., Short, K.R., Deng, Y.M., Carolan, L. et al. (2016) Neutralizing inhibitors in the airways of naïve ferrets do not play a major role in modulating the virulence of H3 subtype influenza A viruses. *Virology* **494**, 143–157, <https://doi.org/10.1016/j.virol.2016.01.024>
- 106 Yu, L., Shang, S., Tao, R., Wang, C., Zhang, L., Peng, H. et al. (2017) High doses of recombinant mannan-binding lectin inhibit the binding of influenza A(H1N1)pdm09 virus with cells expressing DC-SIGN. *APMIS* **125**, 655–664, <https://doi.org/10.1111/apm.12695>
- 107 Hartshorn, K.L., Webby, R., White, M.R., Tecle, T., Pan, C., Boucher, S. et al. (2008) Role of viral hemagglutinin glycosylation in anti-influenza activities of recombinant surfactant protein D. *Respir. Res.* **9**, 65, <https://doi.org/10.1186/1465-9921-9-65>
- 108 Kongchanagul, A., Suptawiwat, O., Boonarkart, C., Kitphati, R., Puthavathana, P., Uiprasertkul, M. et al. (2011) Decreased expression of surfactant protein D mRNA in human lungs in fatal cases of H5N1 avian influenza. *J. Med. Virol.* **83**, 1410–1417, <https://doi.org/10.1002/jmv.22105>
- 109 Panaampon, J., Ngaosuwanuk, N., Suptawiwat, O., Noisumdaeng, P., Sangsiriwut, K., Siridechadilok, B. et al. (2012) A novel pathogenic mechanism of highly pathogenic avian influenza H5N1 viruses involves hemagglutinin mediated resistance to serum innate inhibitors. *PLoS One* **7**, e36318, <https://doi.org/10.1371/journal.pone.0036318>
- 110 Guo, J., Cao, Y., Qin, K., Zhao, X., Wang, D. and Li, Z. (2015) Limited effect of recombinant human mannose-binding lectin on the infection of novel influenza A (H7N9) virus in vitro. *Biochem. Biophys. Res. Commun.* **458**, 77–81, <https://doi.org/10.1016/j.bbrc.2015.01.070>
- 111 Chang, W.C., White, M.R., Moyo, P., McClear, S., Thiel, S., Hartshorn, K.L. et al. (2010) Lack of pattern recognition molecule mannose-binding lectin increases susceptibility to influenza A virus infection. *BMC Immunol.* **11**, 6A, <https://doi.org/10.1186/1471-2172-11-64>
- 112 Tate, M.D., Brooks, A.G. and Reading, P.C. (2011) Inhibition of lectin-mediated innate host defenses in vivo modulates disease severity during influenza virus infection. *Immunol. Cell Biol.* **89**, 482–491, <https://doi.org/10.1038/icb.2010.113>
- 113 Sun, X., Jayaraman, A., ManiPrasad, P., Raman, R., Houser, K.V., Pappas, C. et al. (2013) N-linked glycosylation of the hemagglutinin protein influences virulence and antigenicity of the 1918 pandemic and seasonal H1N1 influenza A viruses. *J. Virol.* **87**, 8756–8766, <https://doi.org/10.1128/JVI.00593-13>
- 114 LeVine, A.M., Whitsett, J.A., Hartshorn, K.L., Crouch, E.C. and Korfhagen, T.R. (2001) Surfactant protein D enhances clearance of influenza A virus from the lung in vivo. *J. Immunol.* **167**, 5868–5873, <https://doi.org/10.4049/jimmunol.167.10.5868>
- 115 Hawgood, S., Brown, C., Edmondson, J., Stumbaugh, A., Allen, L., Goerke, J. et al. (2004) Pulmonary collectins modulate strain-specific influenza A virus infection and host responses. *J. Virol.* **78**, 8565–8672, <https://doi.org/10.1128/JVI.78.16.8565-8572.2004>
- 116 Belsler, J.A., Eckert, A.M., Tumpey, T.M. and Maines, T.R. (2016) Complexities in ferret influenza virus pathogenesis and transmission models. *Microbiol. Mol. Biol. Rev.* **80**, 733–744, <https://doi.org/10.1128/MMBR.00022-16>
- 117 Ling, M.T., Tu, W. and Han, Y. (2012) Mannose-binding lectin contributes to deleterious inflammatory response in pandemic H1N1 and avian H9N2 infection. *J. Infect. Dis.* **205**, 44–53, <https://doi.org/10.1093/infdis/jir691>
- 118 Honda, Y., Takahashi, H., Kuroki, Y., Akino, T. and Abe, S. (1996) Decreased contents of surfactant proteins A and D in BAL fluids of healthy smokers. *Chest* **109**, 1006–1009, <https://doi.org/10.1378/chest.109.4.1006>
- 119 Reading, P.C., Allison, J., Crouch, E.C. and Anders, E.M. (1998) Increased susceptibility of diabetic mice to influenza virus infection: compromise of collectin-mediated host defense of the lung by glucose? *J. Virol.* **72**, 6884–6887
- 120 Noah, T.L., Murphy, P.C. and Alink, J.J. (2003) Bronchoalveolar lavage fluid surfactant protein-A and surfactant protein-D are inversely related to inflammation in early cystic fibrosis. *Am. J. Respir. Crit. Care Med.* **168**, 685–691, <https://doi.org/10.1164/rccm.200301-0050C>
- 121 Sims, M.W., Tal-Singer, R.M., Kierstein, S., Musani, A.I., Beers, M.F., Panettieri, R.A. et al. (2008) Chronic obstructive pulmonary disease and inhaled steroids alter surfactant protein D (SP-D) levels: a cross-sectional study. *Respir. Res.* **9**, 13, <https://doi.org/10.1186/1465-9921-9-13>
- 122 Gao, L., Shang, S., Zhang, C., Tong, M. and Chen, Y. (2014) Lower mannose-binding lectin contributes to deleterious H1N1 2009 infection in children. *APMIS* **122**, 136–139, <https://doi.org/10.1111/apm.12111>
- 123 Hartshorn, K.L., Sastry, K., White, M.R., Anders, E.M., Super, M., Ezekowitz, R.A. et al. (1993) Human mannose-binding protein functions as an opsonin for influenza A viruses. *J. Clin. Invest.* **91**, 1414–1420, <https://doi.org/10.1172/JCI116345>
- 124 Hartshorn, K.L., Crouch, E.C., White, M.R., Eggleton, P., Tauber, A.I., Chang, D. et al. (1994) Evidence for a protective role of pulmonary surfactant protein D (SP-D) against influenza A viruses. *J. Clin. Invest.* **94**, 311–319, <https://doi.org/10.1172/JCI117323>
- 125 Hartshorn, K.L., Reid, K.B., White, M.R., Jensenius, J.C., Morris, S.M., Tauber, A.I. et al. (1996) Neutrophil deactivation by influenza A viruses: mechanisms of protection after viral opsonization with collectins and hemagglutination-inhibiting antibodies. *Blood* **87**, 3450–3461
- 126 Hartshorn, K.L., White, M.R., Shepherd, V., Reid, K., Jensenius, J.G. and Crouch, E.C. (1997) Mechanisms of anti-influenza activity of surfactant proteins A and D: comparison with serum collectins. *Am. J. Physiol.* **273**, L1156–L1166
- 127 Kase, T., Suzuki, Y., Kawai, T., Sakamoto, T., Ohtani, K., Eda, S. et al. (1999) Human mannan-binding lectin inhibits the infection of influenza A virus without complement. *Immunology* **97**, 385–392, <https://doi.org/10.1046/j.1365-2567.1999.00781.x>
- 128 Gardai, S., Xiao, Y.Q., Dickinson, M., Nick, J.A., Voelker, D.R., Greene, K.E. et al. (2003) By binding SIRR or calreticulin/CD91, lung collectins act as dual function surveillance molecules to suppress or enhance inflammation. *Cell* **115**, 13–23, [https://doi.org/10.1016/S0092-8674\(03\)00758-X](https://doi.org/10.1016/S0092-8674(03)00758-X)
- 129 Guo, C.J., Atochina-Vasserman, E.N., Abramova, E., Foley, J., Zaman, A., Crouch, E. et al. (2008) S-nitrosylation of surfactant protein-D controls inflammatory function. *PLoS Biol.* **6**, e266, <https://doi.org/10.1371/journal.pbio.0060266>
- 130 Fujita, T., Matsushita, M. and Endo, Y. (2004) The lectin-complement pathway—its role in innate immunity and evolution. *Immunol. Rev.* **198**, 185–202, <https://doi.org/10.1111/j.0105-2896.2004.0123.x>
- 131 Takahashi, M., Mori, S., Shigeta, S. and Fujita, T. (2007) Role of MBL-associated serine protease (MASP) on activation of the lectin complement pathway. *Adv. Exp. Med. Biol.* **598**, 93–104, [https://doi.org/10.1007/978-0-387-71767-8\\_8](https://doi.org/10.1007/978-0-387-71767-8_8)

- 132 Kase, T., Suzuki, Y., Kawai, T., Sakamoto, T., Ohtani, K., Eda, S. et al. (1999) Human mannan-binding lectin inhibits the infection of influenza A virus without complement. *Immunology* **97**, 385–392, <https://doi.org/10.1046/j.1365-2567.1999.00781.x>
- 133 Tate, M.D., Brooks, A.G. and Reading, P.C. (2011) Specific sites of N-linked glycosylation on the hemagglutinin of H1N1 subtype influenza A virus determine sensitivity to inhibitors of the innate immune system and virulence in mice. *J. Immunol.* **187**, 1884–1894, <https://doi.org/10.4049/jimmunol.1100295>
- 134 Hillaire, M.L., van Eijk, M., Nieuwkoop, N.J., Vogelzang-van Trierum, S.E., Foucher, R.A., Osterhaus, A.D. et al. (2012) The number and position of N-linked glycosylation sites in the hemagglutinin determine differential recognition of seasonal and 2009 pandemic H1N1 influenza virus by porcine surfactant protein D. *Virus Res.* **169**, 301–305, <https://doi.org/10.1016/j.virusres.2012.08.003>
- 135 Goh, B.C., Rynkiewicz, M.J., Cafarella, T.R., White, M.R., Hartshorn, K.L., Allen, K. et al. (2013) Molecular mechanisms of inhibition of influenza by surfactant protein D revealed by large-scale molecular dynamics simulation. *Biochemistry* **52**, 8527–8538, <https://doi.org/10.1021/bi4010683>
- 136 Nikolaidis, N.M., White, M.R., Allen, K., Tripathi, S., Qi, L., McDonald, B. et al. (2014) Mutations flanking the carbohydrate binding site of surfactant protein D confer antiviral activity for pandemic influenza A viruses. *Am. J. Physiol. Lung Cell Mol. Physiol.* **306**, L1036–1044, <https://doi.org/10.1152/ajplung.00035.2014>
- 137 Londrigan, S.L., Tate, M.D. and Brooks, A.G. (2012) Cell-surface receptors on macrophages and dendritic cells for attachment and entry of influenza virus. *J. Leukoc. Biol.* **92**, 97–106, <https://doi.org/10.1189/jlb.1011492>
- 138 Grayson, M.H. and Holtzman, M.J. (2007) Emerging role of dendritic cells in respiratory viral infections. *J. Mol. Med.* **85**, 1057–1068, <https://doi.org/10.1007/s00109-007-0212-3>
- 139 Tate, M.D., Pickett, D.L., van Rooijen, N., Brooks, A.G. and Reading, P.C. (2010) Critical role of airway macrophages in modulating disease severity during influenza virus infection of mice. *J. Virol.* **84**, 7569–7580, <https://doi.org/10.1128/JVI.00291-10>
- 140 Thitithanyanont, A., Engering, A., Ekchariyawat, P., Wiboon-ut, S., Limsalakpetch, A., Yongvanitchit, K. et al. (2007) High susceptibility of human dendritic cells to avian influenza H5N1 virus infection and protection by IFN- $\alpha$  and TLR ligands. *J. Immunol.* **179**, 5220–5227, <https://doi.org/10.4049/jimmunol.179.8.5220>
- 141 Perrone, L.A., Plowden, J.K., García-Sastre, A., Katz, J.M. and Tumpey, T.M. (2008) H5N1 and 1918 pandemic influenza virus infection results in early and excessive infiltration of macrophages and neutrophils in the lungs of mice. *PLoS Pathog.* **4**, e1000115, <https://doi.org/10.1371/journal.ppat.1000115>
- 142 Manicassamy, B., Manicassamy, S., Belicha-Villanueva, A., Pisanelli, G., Pulendran, B. and García-Sastre, A. (2010) Analysis of *in vivo* dynamics of influenza virus infection in mice using a GFP reporter virus. *Proc. Natl. Acad. Sci. U.S.A.* **107**, 11531–11536, <https://doi.org/10.1073/pnas.0914994107>
- 143 Cline, T.D., Karlsson, E.A., Seufzer, B.J. and Schultz-Cherry, S. (2013) The hemagglutinin protein of highly pathogenic H5N1 influenza viruses overcomes an early block in the replication cycle to promote productive replication in macrophages. *J. Virol.* **87**, 1411–1419, <https://doi.org/10.1128/JVI.02682-12>
- 144 Cline, T.D., Beck, D. and Bianchini, E. (2017) Influenza virus replication in macrophages: balancing protection and pathogenesis. *J. Gen. Virol.* **98**, 2401–2412, <https://doi.org/10.1099/jgv.0.000922>
- 145 Mummidi, S., Catano, G., Lam, L., Hoeffle, A., Telles, V., Begum, K. et al. (2001) Extensive repertoire of membrane-bound and soluble dendritic cell-specific ICAM-3-grabbing nonintegrin 1 (DC-SIGN1) and DC-SIGN2 isoforms. Inter-individual variation in expression of DC-SIGN transcripts. *J. Biol. Chem.* **276**, 33196–33212, <https://doi.org/10.1074/jbc.M009807200>
- 146 Gillespie, L., Roosendahl, P., Ng, W.C., Brooks, A.G., Reading, P.C. and Londrigan, S.L. (2016) Endocytic function is critical for influenza A virus infection via DC-SIGN and L-SIGN. *Sci. Rep.* **6**, 19428, <https://doi.org/10.1038/srep19428>
- 147 Na-Ek, P., Thewsoongnoen, J., Thanunchai, M., Wiboon-Ut, S., Sa-Ard-lam, N., Mahanonda, R. et al. (2017) The activation of B cells enhances DC-SIGN expression and promotes of B cells to HPAI H5N1 infection. *Biochem. Biophys. Res. Commun.* **490**, 1301–1306, <https://doi.org/10.1016/j.bbrc.2017.07.017>
- 148 Vasta, G.R. (2012) Galectins as pattern recognition receptors: structure, function, and evolution. *Adv. Exp. Med. Biol.* **946**, 21–36, [https://doi.org/10.1007/978-1-4614-0106-3\\_2](https://doi.org/10.1007/978-1-4614-0106-3_2)
- 149 Nio-Kobayashi, J. (2017) Tissue- and cell-specific localization of galectins,  $\beta$ -galactose-binding animal lectins, and their potential functions in health and disease. *Anat. Sci. Int.* **92**, 25–36, <https://doi.org/10.1007/s12565-016-0366-6>
- 150 Vasta, G.R. (2009) Roles of galectins in infection. *Nat. Rev. Microbiol.* **7**, 424–438, <https://doi.org/10.1038/nrmicro2146>
- 151 Yang, M.-L., Chen, Y.-H., Wang, S.-W., Huang, Y.-J., Leu, C.-H., Yeh, N.-C. et al. (2011) Galectin-1 binds to influenza virus and ameliorates influenza virus pathogenesis. *J. Virol.* **85**, 10010–10020, <https://doi.org/10.1128/JVI.00301-11>
- 152 Li, S.W., Yang, T.C., Lai, C.C., Huang, S.H., Liao, J.M., Wan, L. et al. (2014) Antiviral activity of aloe-emodin against influenza A virus via galectin-3 up-regulation. *Eur. J. Pharmacol.* **738**, 125–132, <https://doi.org/10.1016/j.ejphar.2014.05.028>
- 153 Chen, Y., Zhou, J., Cheng, Z., Yang, S., Chu, H., Fan, Y. et al. (2015) Functional variants regulating LGALS1 (Galectin 1) expression affect human susceptibility to influenza A(H7N9). *Sci. Rep.* **5**, 8517, <https://doi.org/10.1038/srep08517>
- 154 Chen, Y.J., Wang, S.F., Weng, I.C., Hong, M.H., Lo, T.H., Jan, J.T. et al. (2018) Galectin-3 enhances avian H5N1 influenza A virus-induced pulmonary inflammation by promoting NLRP3 inflammasome activation. *Am. J. Pathol.* **188**, 1031–1042, <https://doi.org/10.1016/j.ajpath.2017.12.014>
- 155 Sharma, S., Sundararajan, A., Suryawanshi, A., Kumar, N., Veiga-Parga, T., Kuchroo, V.K. et al. (2011) T cell immunoglobulin and mucin protein-3 (Tim-3)/Galectin-9 interaction regulates influenza A virus-specific humoral and CD8 T-cell responses. *Proc. Natl. Acad. Sci. U.S.A.* **108**, 19001–19006, <https://doi.org/10.1073/pnas.1107087108>
- 156 Katoh, S., Ikeda, M., Shimizu, H., Mouri, K., Obase, Y., Kobashi, Y. et al. (2014) Increased levels of plasma galectin-9 in patients with influenza virus infection. *Tohoku J. Exp. Med.* **232**, 263–267, <https://doi.org/10.1620/tjem.232.263>

- 157 Chernyy, E.S., Rapoport, E.M., Andre, S., Kalthner, H., Gabius, H.J. and Bovin, N.V. (2011) Galectins promote the interaction of influenza virus with its target cells. *Biochemistry* **76**, 958–967, <https://doi.org/10.1134/S0006297911080128>
- 158 Nita-Lazar, M., Banerjee, A., Feng, C., Amin, M.N., Frieman, M.B., Chen, W.H. et al. (2015) Desialylation of airway epithelial cells during influenza virus infection enhances pneumococcal adhesion via galectin binding. *Mol. Immunol.* **65**, 1–16, <https://doi.org/10.1016/j.molimm.2014.12.010>
- 159 Matsushita, M. (2010) Ficolins: complement-activating lectins involved in innate immunity. *J. Innate Immun.* **2**, 24–32, <https://doi.org/10.1159/000228160>
- 160 Ichijo, H., Ronnstrand, L., Miyagawa, K., Ohashi, H., Heldin, C.H. and Miyazono, K. (1991) Purification of transforming growth factor-beta 1 binding proteins from porcine uterus membranes. *J. Biol. Chem.* **266**, 22459–22464
- 161 Endo, Y., Sato, Y., Matsushita, M. and Fujita, T. (1996) Cloning and characterization of the human lectin P35 gene and its related gene. *Genomics* **36**, 515–521, <https://doi.org/10.1006/geno.1996.0497>
- 162 Lu, J., Le, Y., Kon, O.L., Chan, J. and Lee, S.H. (1996) Biosynthesis of human ficolin, an Escherichia coli-binding protein, by monocytes: comparison with the synthesis of two macrophage-specific proteins, C1q and the mannose receptor. *Immunology* **89**, 289–294, <https://doi.org/10.1046/j.1365-2567.1996.d01-732.x>
- 163 Sugimoto, R., Yae, Y., Akaiwa, M., Kitajima, S., Shibata, Y., Sato, H. et al. (1998) Cloning and characterization of the Hakata antigen, a member of the ficolin/opsonin p35 lectin family. *J. Biol. Chem.* **273**, 20721–20727, <https://doi.org/10.1074/jbc.273.33.20721>
- 164 Lu, J., Le, Y., Kon, O.L., Chan, J. and Lee, S.H. (1996) Biosynthesis of human ficolin, an Escherichia coli-binding protein, by monocytes: Comparison with the synthesis of two macrophage-specific proteins, C1q and the mannose receptor. *Immunology* **89**, 289–294, <https://doi.org/10.1046/j.1365-2567.1996.d01-732.x>
- 165 Matsushita, M., Endo, Y., Taira, S., Sato, Y., Fujita, T., Ichikawa, N. et al. (1996) A novel human serum lectin with collagen- and fibrinogen-like domains that functions as an opsonin. *J. Biol. Chem.* **271**, 2448–2454, <https://doi.org/10.1074/jbc.271.5.2448>
- 166 Akaiwa, M., Yae, Y., Sugimoto, R., Suzuki, S.O., Iwaki, T., Izuhara, K. et al. (1999) Hakata antigen, a new member of the ficolin/opsonin p35 family, is a novel human lectin secreted into bronchus/alveolus and bile. *J. Histochem. Cytochem.* **47**, 777–786, <https://doi.org/10.1177/002215549904700607>
- 167 Liu, Y., Endo, Y., Iwaki, D., Nakata, M., Matsushita, M., Wada, I. et al. (2005) Human M-ficolin is a secretory protein that activates the lectin complement pathway. *J. Immunol.* **175**, 3150–3156, <https://doi.org/10.4049/jimmunol.175.5.3150>
- 168 Kilpatrick, D.C., Fujita, T. and Matsushita, M. (1999) P35, an opsonic lectin of the ficolin family, in human blood from neonates, normal adults, and recurrent miscarriage patients. *Immunol. Lett.* **67**, 109–112, [https://doi.org/10.1016/S0165-2478\(98\)00147-3](https://doi.org/10.1016/S0165-2478(98)00147-3)
- 169 Munthe-Fog, L., Hummelshoj, T., Hansen, B.E., Koch, C., Madsen, H.O., Skjodt, K. et al. (2007) The impact of FCN2 polymorphisms and haplotypes on the Ficolin-2 serum levels. *Scand. J. Immunol.* **65**, 383–392, <https://doi.org/10.1111/j.1365-3083.2007.01915.x>
- 170 Wittenborn, T., Thiel, S., Jensen, L., Nielsen, H.J. and Jensenius, J.C. (2010) Characteristics and biological variations of M-ficolin, a pattern recognition molecule, in plasma. *J. Innate Immunol.* **2**, 167–180, <https://doi.org/10.1159/000218324>
- 171 Verma, A., White, M., Vathipadiekal, V., Tripathi, S., Mbianda, J., Jeong, M. et al. (2012) Human H-ficolin inhibits replication of seasonal and pandemic influenza A viruses. *J. Immunol.* **189**, 2478–2487, <https://doi.org/10.4049/jimmunol.1103786>
- 172 White, M.R., Tripathi, S., Kingma, P., Takahashi, K., Jensenius, J., Thiel, S. et al. (2017) Collectins, H-ficolin and LL-37 reduce influenza viral replication in human monocytes and modulate virus-induced cytokine production. *Innate Immunol.* **23**, 77–88, <https://doi.org/10.1177/1753425916678470>
- 173 Pan, Q., Chen, H., Wang, F., Jeza, V.T., Hou, W., Zhao, Y. et al. (2012) L-ficolin binds to the glycoproteins hemagglutinin and neuraminidase and inhibits influenza A virus infection both *in vitro* and *in vivo*. *J. Innate Immunol.* **4**, 312–324, <https://doi.org/10.1159/000335670>
- 174 Crouch, E., Nikolaidis, N., McCormack, F.X., McDonald, B., Allen, K., Rynkiewicz, M.J. et al. (2011) Mutagenesis of surfactant protein D informed by evolution and x-ray crystallography enhances defenses against influenza A virus *in vivo*. *J. Biol. Chem.* **286**, 40681–40692, <https://doi.org/10.1074/jbc.M111.300673>
- 175 Al-Ahdal, M.N., Murugaiah, V., Varghese, P.M., Abozaid, S.M., Saba, I., Al-Qahtani, A.A. et al. (2018) Entry inhibition and modulation of pro-inflammatory immune response against influenza A virus by recombinant truncated surfactant protein D. *Front. Immunol.* **9**, 1586, <https://doi.org/10.3389/fimmu.2018.01586>
- 176 Hillaire, M.L., van Eijk, M., Vogelzang-van Trierum, S.E., Fouchier, R.A., Osterhaus, A.D., Haagsman, H.P. et al. (2014) Recombinant porcine surfactant protein D inhibits influenza A virus replication *ex vivo*. *Virus Res.* **181**, 22–26, <https://doi.org/10.1016/j.virusres.2013.12.032>
- 177 van Eijk, M., Rynkiewicz, M.J., Khatri, K., Leymarie, N., Zaia, J., White, M.R. et al. (2018) Lectin-mediated binding and sialoglycans of porcine surfactant protein D synergistically neutralize influenza A virus. *J. Biol. Chem.* **293**, 10646–10662, <https://doi.org/10.1074/jbc.RA117.001430>
- 178 Chang, W.C., Hartshorn, K.L., White, M.R., Moyo, P., Michelow, I.C., Koziel, H. et al. (2011) Recombinant chimeric lectins consisting of mannose-binding lectin and L-ficolin are potent inhibitors of influenza A virus compared with mannose-binding lectin. *Biochem. Pharmacol.* **81**, 388–395, <https://doi.org/10.1016/j.bcp.2010.10.012>
- 179 Takahashi, K., Moyo, P., Chigweshe, L., Chang, W.C., White, M.R. and Hartshorn, K.L. (2013) Efficacy of recombinant chimeric lectins, consisting of mannose binding lectin and L-ficolin, against influenza A viral infection in mouse model study. *Virus Res.* **178**, 495–501, <https://doi.org/10.1016/j.virusres.2013.10.001>
- 180 Rota, P.A., Wallis, T.R., Harmon, M.W., Rota, J.S., Kendal, A.P. and Nerome, K. (1990) Cocirculation of two distinct evolutionary lineages of influenza type B virus since 1983. *Virology* **175**, 59–68, [https://doi.org/10.1016/0042-6822\(90\)90186-U](https://doi.org/10.1016/0042-6822(90)90186-U)
